# Supplementary material
Source: publisher figshare collection journal article supplement (https://acs.figshare.com/ndownloader/files/11637284)
Supplement: Supplementary file 1 [file 11637284]

## Supporting information

### Understanding complex mechanisms of enzyme reactivity: the case of Limonene-1,2-epoxide hydrolases.

Silvia Rinaldi,<sup>1</sup> Marc W. Van der Kamp,<sup>2,3</sup> Kara E. Ranaghan,<sup>2</sup> Adrian J. Mulholland,<sup>2\*</sup> Giorgio Colombo<sup>1,4\*</sup>

<sup>1</sup> Istituto di Chimica del Riconoscimento Molecolare, C.N.R., Via Mario Bianco 9, 20131 Milano, Italy

<sup>2</sup> Centre for Computational Chemistry, School of Chemistry, University of Bristol, Cantock's Close, Bristol, BS8 1TS United Kingdom

<sup>3</sup> School of Biochemistry, University of Bristol, University Walk, Bristol, BS8 1TD United Kingdom

<sup>4</sup> Dipartimento di Chimica, Università degli Studi di Pavia, Via Taramelli 12, 27100 Pavia, Italy

Authors to whom correspondence should be addressed:

\*Giorgio Colombo: [g.colombo@unipv.it](mailto:g.colombo@unipv.it)

\*Adrian J. Mulholland: [Adrian.Mulholland@bristol.ac.uk](mailto:Adrian.Mulholland@bristol.ac.uk)

## Contents

|                                                                                                                                          |            |
|------------------------------------------------------------------------------------------------------------------------------------------|------------|
| <b>Substrate Docking .....</b>                                                                                                           | <b>S2</b>  |
| <b>MD simulations .....</b>                                                                                                              | <b>S3</b>  |
| <b>QM/MM simulations .....</b>                                                                                                           | <b>S3</b>  |
| <b><i>WaterSwap</i> calculations of substrate binding affinities .....</b>                                                               | <b>S6</b>  |
| <b>MD simulations of models with ligands occupying a single monomer .....</b>                                                            | <b>S10</b> |
| <b>Cartesian Coordinates of Reactant, Transition State and Product structures from the B3LYP/6-31G*/ff99SB/SCC-DFTB/ff99SB PES .....</b> | <b>S16</b> |
| <b>References .....</b>                                                                                                                  | <b>S28</b> |

## Substrate Docking

The receptor and the ligands were first refined using the Schrodinger Maestro suite (Release 2013-1-9.4, Schrödinger, LLC, New York, NY, 2013) and then the catalytic site was mapped onto a grid with default parameters centered on the co-crystallized natural valpromide inhibitor, assuming that valpromide binds in a position similar to that of the LEH substrates (Figure S1).<sup>1</sup> As the valpromide carbonyl is found in hydrogen-bonding distance to Asp101 in the crystal structure, we defined the H-bond distance between the epoxide oxygen and the carboxylic acid as a positional constraint during the docking run. Docking calculations were performed using Glide,<sup>2</sup> keeping the receptor rigid and allowing flexibility for the ligands. Docking calculations were performed in Standard Precision mode (SP) with the OPLS-AA (2001) force field<sup>3</sup> using default settings. The best poses of the docking runs were selected using the Emodel empirical scoring function implemented in Maestro.

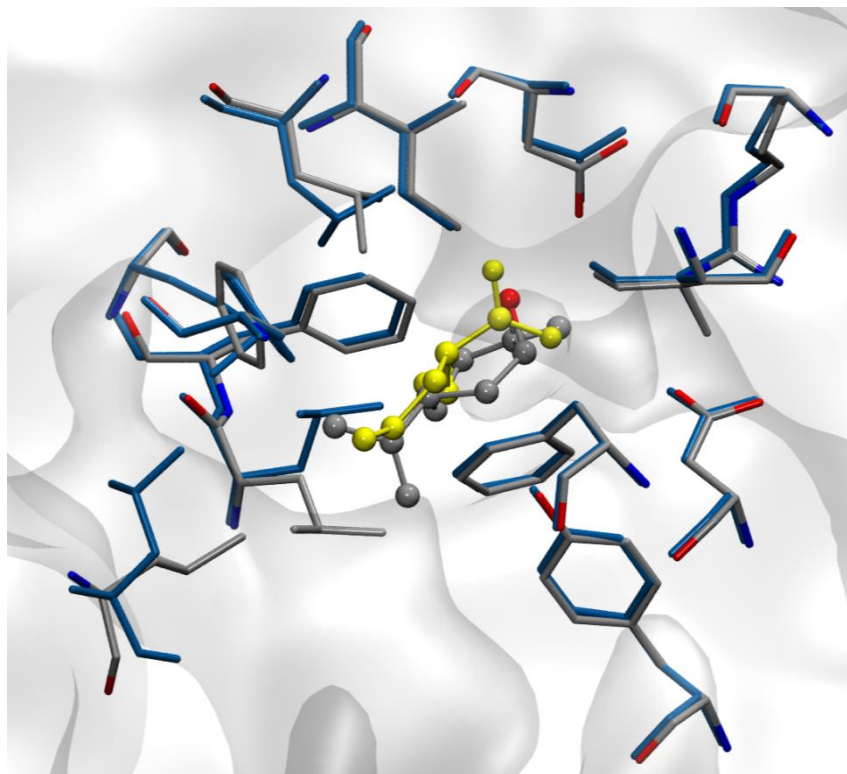

**Figure S1.** Comparison of the ligand cavity conformations in the presence (PDB code: 1nu3, VMD licorice representation) and in the absence (PDB code: 1nww, VMD blue licorice representation) of the inhibitor valpromide (yellow CPK VMD representation). The starting docking pose for limonene-1,2-epoxide is also shown (CPK VMD representation).

## MD simulations

For all the simulations AMBER 12.0 package<sup>4</sup> was used with the AMBER ff99SB and with GAFF<sup>5</sup> for the ligands. Ligand parameters and AM1BCC partial charges were generated using Antechamber.<sup>6</sup> All the structures were solvated in a cuboid TIP3P water box<sup>7</sup> of dimensions of 77.4 Å X 67.5 Å X 65.7 Å. Counterions were added to ensure overall charge neutrality (15 Na<sup>+</sup> atoms) using the LeaP module of AMBER. The system was first minimized using the steepest descents algorithm. Secondly, a 0.4 ns simulation was run in the NVT ensemble in which the positions of  $\alpha$ -carbons were weakly restrained (force constant,  $k = 10 \text{ kcal mol}^{-1} \text{ \AA}^{-2}$ ) and slowly increasing the temperature up to 300 K. Subsequently, a 0.2 ns simulation in the NPT ensemble was performed maintaining the same restraints. Finally, the whole system was simulated under NPT conditions for 100 ns (300 K, 1 atm) with a 1 fs time-step. All the simulations were performed applying periodic boundary conditions (PBC). Short-range electrostatic and van der Waals interactions were calculated within a 10 Å cutoff, whereas long-range electrostatic interactions were assessed using the particle Ewald method.<sup>8</sup> The Shake algorithm was used to treat all bonds involving hydrogen atoms.<sup>9</sup> PEO ligand shows a high mobility within its binding pocket, making the correct evaluation of the effects of PEO on LEH structures difficult. Thus, in order to correctly evaluate the effect of the PEO ligand on the enzyme dynamics and obtain an equilibrated starting structure for free energy calculations, we restrained PEO - Asp101 and the catalytic water - Asp132 to be within a hydrogen-bond distance in each case (a1 and a2 distance in figure S2, force constant,  $k = 100 \text{ kcal mol}^{-1} \text{ \AA}^{-2}$ ) in monomer B (PEO-B). No restraints were placed on PEO in monomer A (PEO-A). The results of analysis by ProPKA<sup>10</sup> on the LEH crystal structure, assessed by visual inspection, were used to assign the protonation states of titratable residues. The catalytic Asp101 was predicted to be protonated in agreement with both experimental and computational investigations<sup>1,11</sup> and protonated Asp135 was predicted and used in LEH monomer B. The unique solvent exposed histidine (per monomer) was modeled as a positively charged residue (His85).

## QM/MM simulations

QM/MM MD simulations (AM1/ff99SB) were run using the Sander code available in AMBER12 package.<sup>4</sup> In all cases, a neutral total charge is used for the QM region and 5 link atoms (LAs)<sup>12,13</sup> were used to saturate the QM atoms. The entire system was simulated in the NVT ensemble with a Langevin thermostat (300K).<sup>14</sup> The nonbonded interactions were computed using a cutoff of 10 Å. The system was simulated for 30 ps with a time step of 1 fs. QM/MM MD simulations were performed to

generate suitable structures for the free energy calculations. In order to sample the conformational ensemble around the catalytically active state, we used restraints to maintain the geometrical parameters that are reported to be fundamental for the enzyme catalysis.<sup>11</sup> One representative conformation per system was selected from the snapshots that fulfilled the following criteria: Hwat-OAsp132 (a1) < 2.0 Å, HAsp101-Oepoxide (a2) < 2.0 Å, Owat-Cepoxide (a3) < 3.5 Å, Hwat-OAsn55 (a4) < 2.0 Å (see Figure S2). An accurate estimation of the free energy profile would require the computation of multiple PMFs from different starting conformations. However, the cost of calculating multiple pathways is prohibitive due to the concerted nature of the reaction, requiring multidimensional sampling of reaction coordinates. PMFs (C1-LEO, C2-LEO and PEO) were obtained by performing 20 ps of biased QM/MM MD runs for each of the 266 windows of the Umbrella sampling space. Therefore, our assumption is that the starting, transition-state like conformations (obtained using the same geometrical criteria on each system), can provide the most reliable starting point for the estimation of the free energy barrier. 2D umbrella sampling QM/MM simulations (SCC-DFTB/ff99SB)<sup>15</sup> were performed along the two reaction coordinates (see Methods). The first reaction coordinate described the proton abstraction from the water molecule and the nucleophilic attack, defined as RC1= d1(Owat-Hwat)-d2(Owat-Clim), ranging from -2.2 to 0.4 Å by steps of 0.2 Å (see Figure S3). The second reaction coordinate accounted for the activation of the epoxide by proton transfer and the ring opening: RC2 = d3(Olim-Clim)-d4(Hash-Olim), ranging from -0.4 to 1.4 Å by steps of 0.1 Å (Figure S3). Umbrella sampling runs were performed sampling 20 ps at each window with a force constant of 200 kcal mol<sup>-1</sup> Å<sup>-2</sup>. Snapshots were taken after 10 ps of simulation as the starting point for the subsequent window. In order to reduce the computational time, the QM selection was limited to the side-chains of the catalytic triad (namely, Asp132, Asp101, and Arg99), the nucleophilic water molecule and the ligand. The SCC-DFTB method is known to favor proton transfer processes,<sup>14</sup> thus it was necessary to use mild restraints to avoid the deprotonation of Arg99. Without restraints we observed the deprotonation of Arg99 and a consequent conformational rearrangement which prevented the catalytic arginine bridging between the two aspartates. This would result in an inactive enzyme as demonstrated by experimental point mutations on Arg99.<sup>1</sup> Hence, when the distance between the arginine side-chain nitrogens and the respective hydrogen exceeded 1.2 Å a restraint (force constant  $k = 100 \text{ kcal mol}^{-1} \text{ Å}^{-2}$ ) was applied. Using the transition state-like conformations located on the resulting 3D PMF surface as starting points, potential energy surfaces (PES) were obtained by adiabatic mapping along the reaction coordinates at the same level of theory (SCC-DFTB/ff99SB). Initially, each starting transition state structure was re-optimized with the reaction coordinates restrained by a harmonic potential (force constant,  $k = 1000 \text{ kcal mol}^{-1} \text{ Å}^{-2}$ ) by 200 steps of steepest descents followed by conjugate gradient minimization. Subsequently, 10000 steps of LBFGS minimization<sup>14</sup> were performed with the reaction coordinates restrained by a harmonic potential (force

constant,  $k = 1000 \text{ kcal mol}^{-1} \text{ \AA}^{-2}$ ) until a gradient of  $0.002 \text{ kcal mol}^{-1}$  was reached. Using the resulting conformation, the same protocol was then used to map the potential energy surface, with the difference that mild restraints (force constant of  $50 \text{ kcal mol}^{-1} \text{ \AA}^{-2}$ ) were applied to residues further than  $8 \text{ \AA}$  from the QM region. The series of minimizations were run in both directions along the reaction coordinates by steps of  $0.1 \text{ \AA}$  for both the RCs, using the minimized structure of the preceding step as the starting point. DFT QM/MM (B3LYP/6-31G\*/ff99SB//SCC-DFTB/ff99SB) single point energy calculations (with electrostatic embedding) were finally performed on the geometries optimized at the lower QM/MM level, using the Orca package<sup>14</sup> implemented in Amber. The resulting 513 (27x19) point 3D PESs were ultimately used to give corrections along the reaction paths calculated at semi-empirical levels, as reported in ref<sup>16</sup>. Briefly, the difference between the activation energy calculated at SCC-DFTB/ff99SB and B3LYP/6-31G\*/ff99SB level was divided by the number of points on the free energy profile between the reactant and the transition state, then the result was incrementally added to each point of the SCC-DFTB/ff99SB free energy profile.

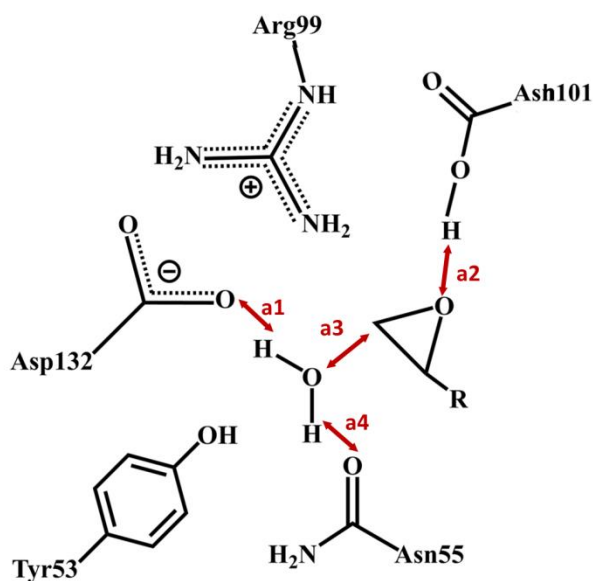

**Figure S2.** LEH Catalytic site and catalytically fundamental geometrical distances

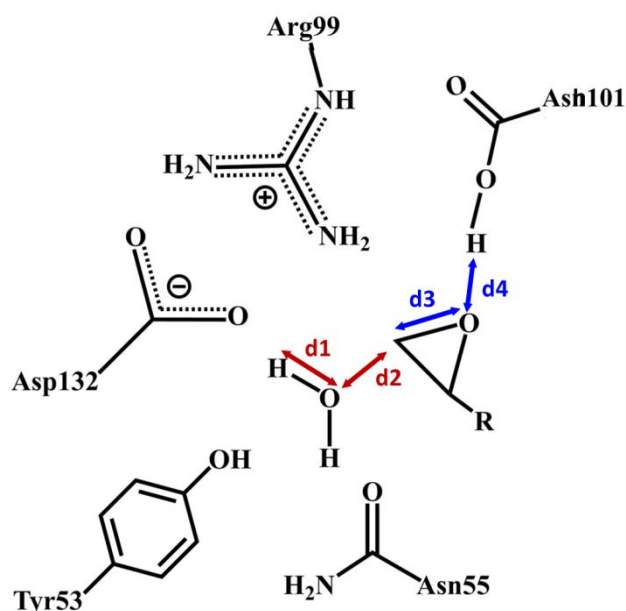

**Figure S3.** Representation of the distances used to define the RC1 (red arrows) and RC2 (blue arrows) reaction coordinates

### **WaterSwap calculations of substrate binding affinities**

*WaterSwap* calculations<sup>17</sup> were performed in order to calculate the absolute protein-ligand binding free energies for the PEO and LEO systems. The calculations were run on structures resulting from cluster analysis of the MD trajectories. The cluster analysis was performed after alignment of the heavy atoms of the binding site (a 4 Å cavity around the QM atoms). Clustering based on the RMSD of the ligand was then carried out using the *ptraj* module of AmberTools<sup>17</sup> to obtain 5 clusters for each system. The most representative structure from each cluster was then used for *WaterSwap* calculations. The binding free energy of each ligand resulted from the weighted average of the representative structures obtained for both the dimer cavities. The standard *WaterSwap* protocol was used:<sup>17</sup>  $\Delta\lambda = 0.001$ , 1000 steps of iterations, 50.000 Monte Carlo moves for each window with a temperature of 298.15 K and pressure of 1 atm, while ligand translation and rotation motions were prevented. Final energies were obtained using the *analyse\_freenrg* analysis method (available in Sire, <https://siremol.org/index.html>), which returns the binding energies averaging over the last 60% of iterations across the lambda windows. The absolute binding affinities for each conformation resulting from the cluster analysis are reported in Table S1.

**Table S1.** *WaterSwap* binding free energies computed on the most representative structures of LEO and PEO binding pockets with their relative weights on the conformational ensemble. The table reports also whether the conformation accounts for a reactive conformation or not. A reactive conformation is described as a state where: 1) at least one nucleophilic water molecule is within 4 Å of both one of the oxirane carbon atoms and an aspartate oxygen; 2) the protonated aspartic acid is within an H-bond distance from the oxirane oxygen.

|        | Coverage | Conformation | Binding Energy         | Error |
|--------|----------|--------------|------------------------|-------|
|        | %        |              | kcal mol <sup>-1</sup> |       |
| PEO.A1 | 50.6     | Reactive     | -11.7                  | 0.3   |
| PEO.A2 | 40.1     | Non-reactive | -11.0                  | 0.3   |
| PEO.A3 | 9.2      | Non-reactive | -14.7                  | 0.2   |
| PEO.B1 | 88.2     | Reactive     | -11.8                  | 0.4   |
| PEO.B2 | 4.6      | Non-reactive | -16.1                  | 0.2   |
| PEO.B3 | 4.4      | Non-reactive | -12.2                  | 0.2   |
| LEO.A1 | 99.6     | Reactive     | -21.1                  | 0.4   |
| LEO.B1 | 99.3     | Reactive     | -24.5                  | 0.1   |

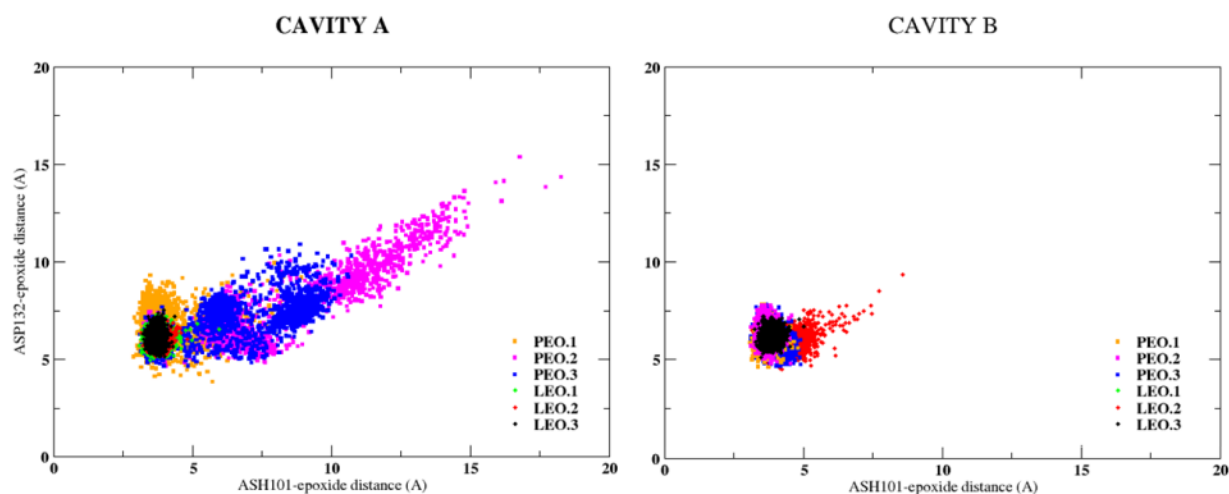

**Figure S4.** Evolution of ligand binding poses along 2 representative coordinates: the distance between Ash101-Cy and epoxide-O and between Asp132-Cy and epoxide-O for cavity A (PEO without restraints) and cavity B (PEO with restraints).

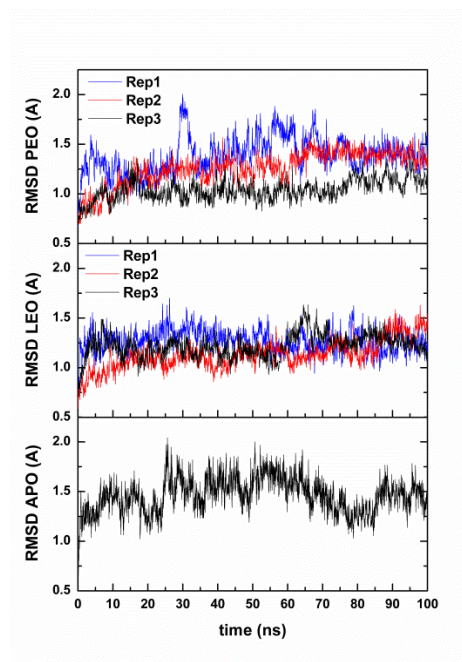

**Figure S5.** Time evolution of the RMSD (Å) of backbone atoms (N- and C-tails excluded) of all the replicate simulations of PEO, LEO and APO systems

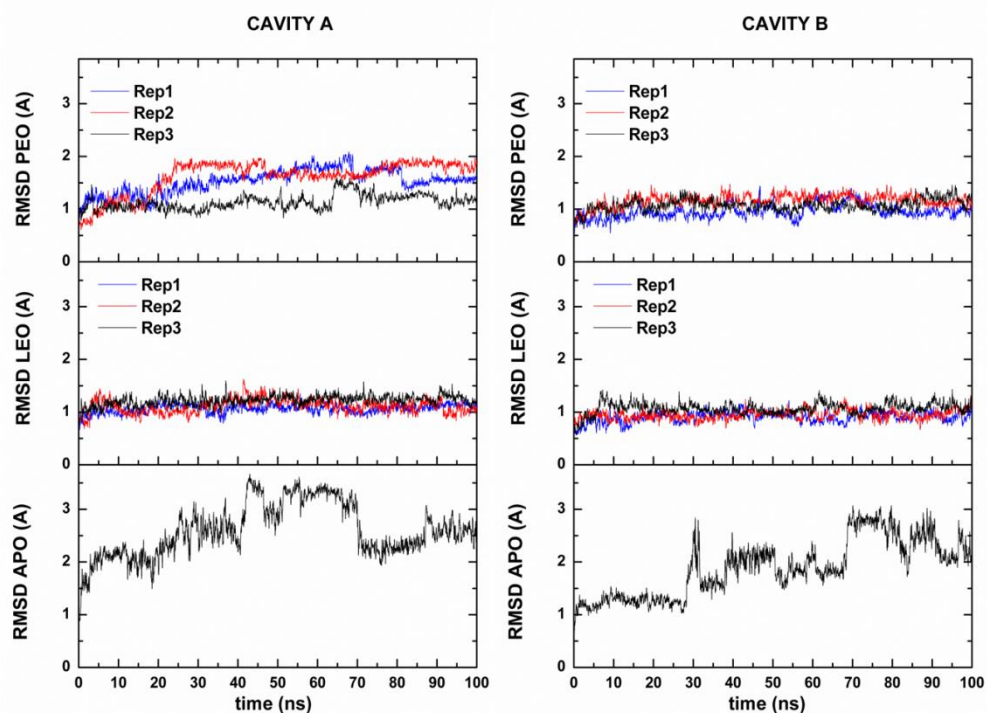

**Figure S6.** RMSD evolution (Å) of the heavy atoms of residues in the active site (defined as the residues that have at least one heavy atom within 4 Å of LEO in the X-ray structure) in monomer A (left) and B (right).



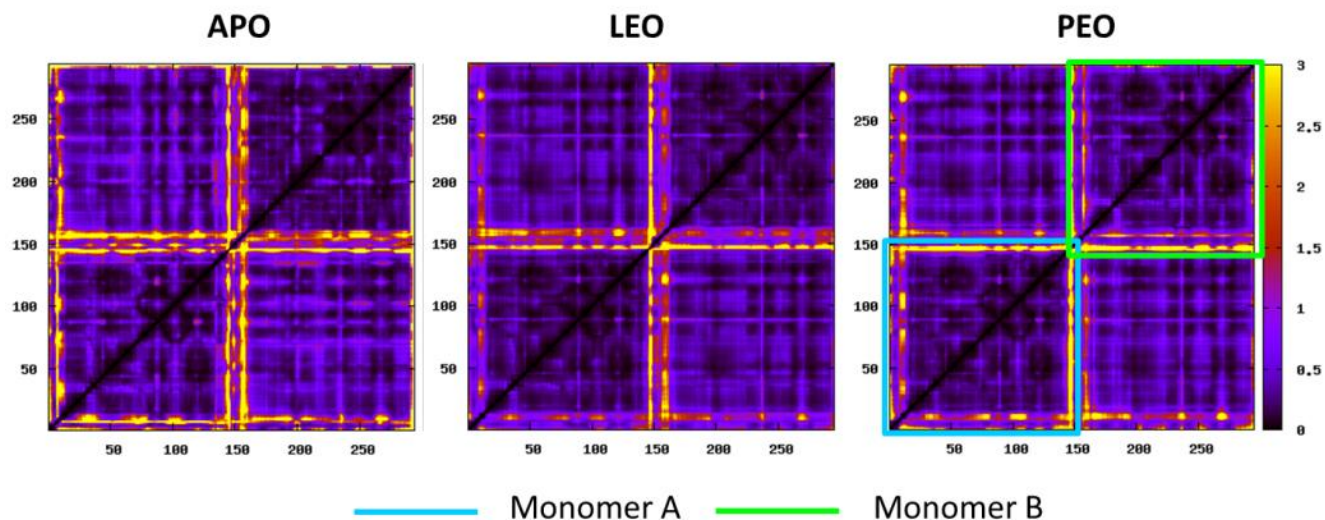

**Figure S7.** Long-range Communication Networks: Distance Fluctuation ( $\text{\AA}^2$ ) matrices (averaged on last 50 ns to 100 ns for all the replica simulations of each system). The long-range communication network is reported as a function of the distance fluctuations between residue pairs: any two residues are defined to be quasi-rigidly coordinated if their distance fluctuation is low (dark regions) or non-coordinated (flexible regions) if their distance fluctuation is high (yellow spots).

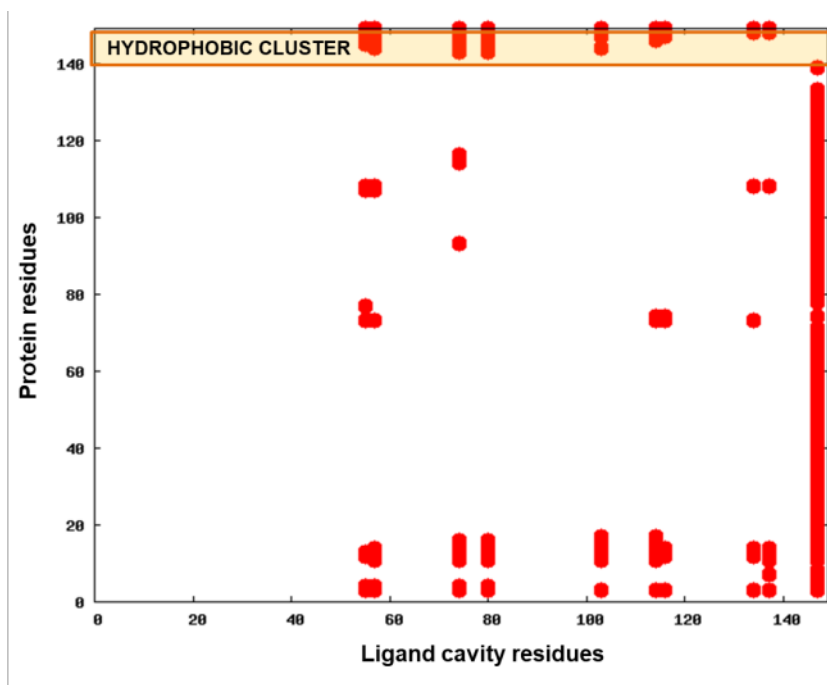

**Figure S8.** Residues of the ligand cavity whose dynamic coordination with the protein residues (identified by the red spots) is increased in the presence of LEO with respect of PEO.

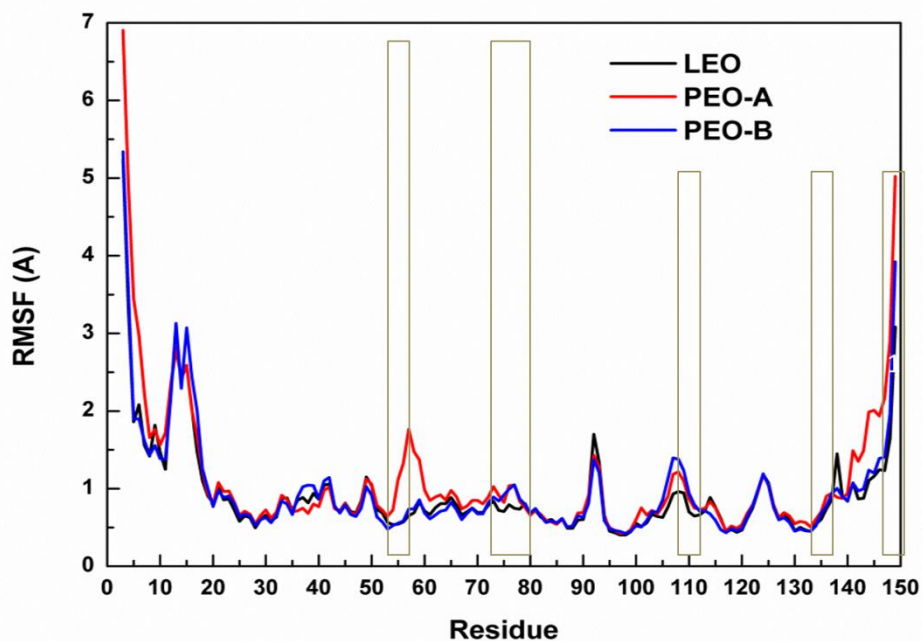

**Figure S9.** RMSF profiles for the LEO, PEO-A and PEO-B systems. Regions belonging to the ligand cavity are highlighted with the grey boxes.

### MD simulations of models with ligands occupying a single monomer

As the enzyme may function with only one of the monomers occupied by a ligand, we built LEH models where the ligand was only bound to monomer A. Two independent 100ns MD simulations were performed on these models. For the PEO model, one of the simulations is performed restraining the ligand position to the active site, while the other simulation is unbiased (as in the PEO-A case). The resulting distance fluctuation matrices (Figure S10) show that the dynamics of monomer A (ligand bound monomer) in each case is similar to their double-occupancy counterpart. Monomer B profiles (where no ligand is bound) show larger mobility, in particular at the N- and C-tails. This reverberates on the Therefore, the monomer-monomer interaction patterns (out of diagonal regions) show intermediate properties between the apo and the doubly-occupied forms. However, the general internal dynamics behavior is not significantly affected by the presence of only one ligand. In particular, the monomer with a ligand bound shows internal dynamics properties consistent with those observed for the monomers in doubly occupied states. As the LEH crystal structure contained inhibitors in both monomers and there is little difference in the dynamics when only one monomer is

liganded, we have used the doubly-occupied models as our reference models described in the main text.

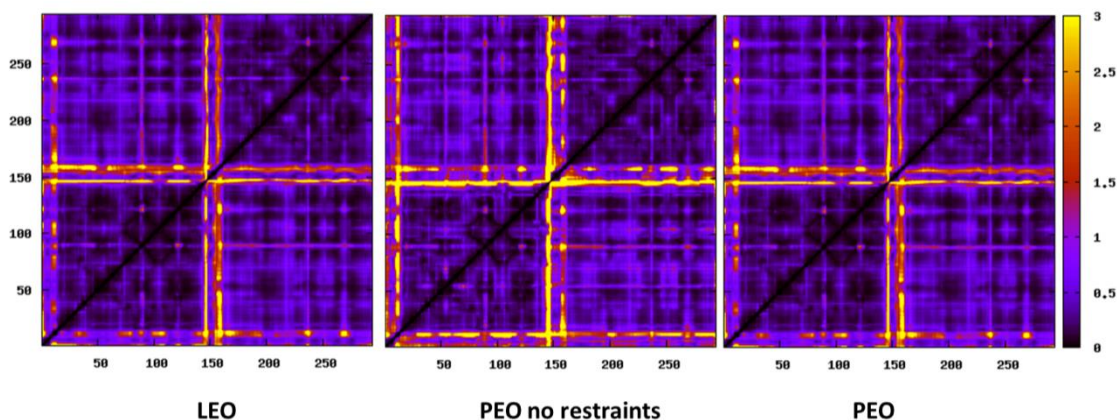

**Figure S10.** Long-range Communication Networks: Distance Fluctuation ( $\text{\AA}^2$ ) matrices for models where only monomer A is occupied by a ligand. The long-range communication network is reported as function of the distance fluctuations between residue pairs: any two residues are defined to be quasi-rigidly coordinated if their distance fluctuation is low (dark regions) or non-coordinated (flexible regions) if their distance fluctuation is high (yellow spots).

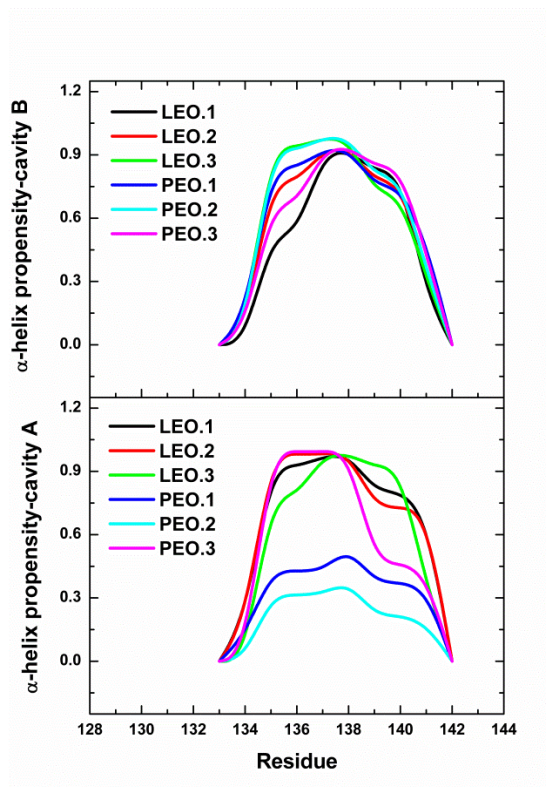

**Figure S11.**  $\alpha$ -helix propensity of the C-terminal helix in the PEO and LEO systems (reported for all the 3 replicas)

### C1-LEO (more substituted carbon)

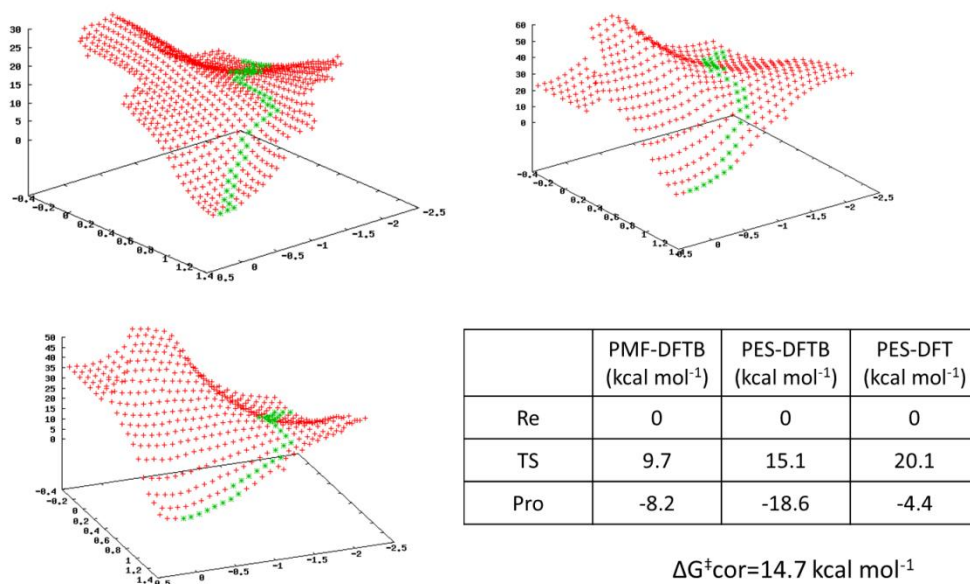

**Figure S12.** SCC-DFTB/ff99SB PMF (top left), SCC-DFTB/ff99SB PES (top right) and B3LYP/6-31G\*/ff99SB//SCC-DFTB/ff99SB PES (bottom left) for C1-LEO system. Green points report the corresponding Minimum Energy Path (MEP). Bottom right. Energy values obtained from the MEPs. The value of the corrected free energy barrier (B3LYP/6-31G\*/ff99SB//SCC-DFTB/ff99SB) is reported ( $\Delta G^{\ddagger}_{\text{cor}}$ ).

### C2-LEO (more substituted carbon)

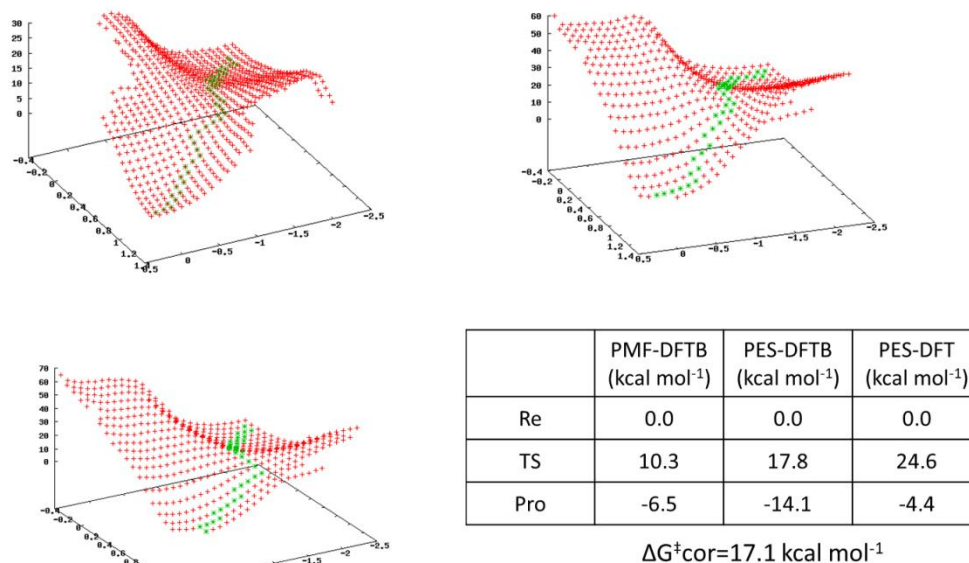

**Figure S13.** SCC-DFTB/ff99SB PMF (top left), SCC-DFTB/ff99SB PES (top right) and B3LYP/6-31G\*/ff99SB//SCC-DFTB/ff99SB PES (bottom left) for C2-LEO system. Green points report the corresponding Minimum Energy Path (MEP).

Bottom right. Energy values obtained from the MEPs. The value of the corrected free energy barrier (B3LYP/6-31G\*/ff99SB//SCC-DFTB/ff99SB) is reported ( $\Delta G_{cor}^\ddagger$ ).

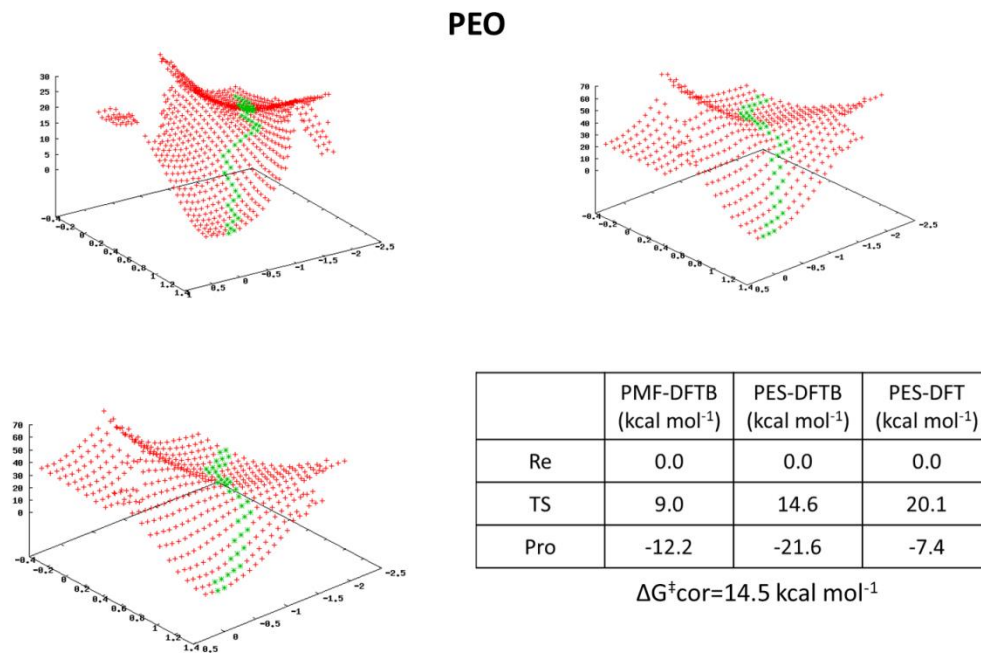

**Figure S14.** SCC-DFTB/ff99SB PMF (top left), SCC-DFTB/ff99SB PES (top right) and B3LYP/6-31G\*/ff99SB//SCC-DFTB/ff99SB PES (bottom left) for PEO system. Green points report the corresponding Minimum Energy Path (MEP). Bottom right. Energy values obtained from the MEPs. The value of the corrected free energy barrier (B3LYP/6-31G\*/ff99SB//SCC-DFTB/ff99SB) is reported ( $\Delta G_{cor}^\ddagger$ ).



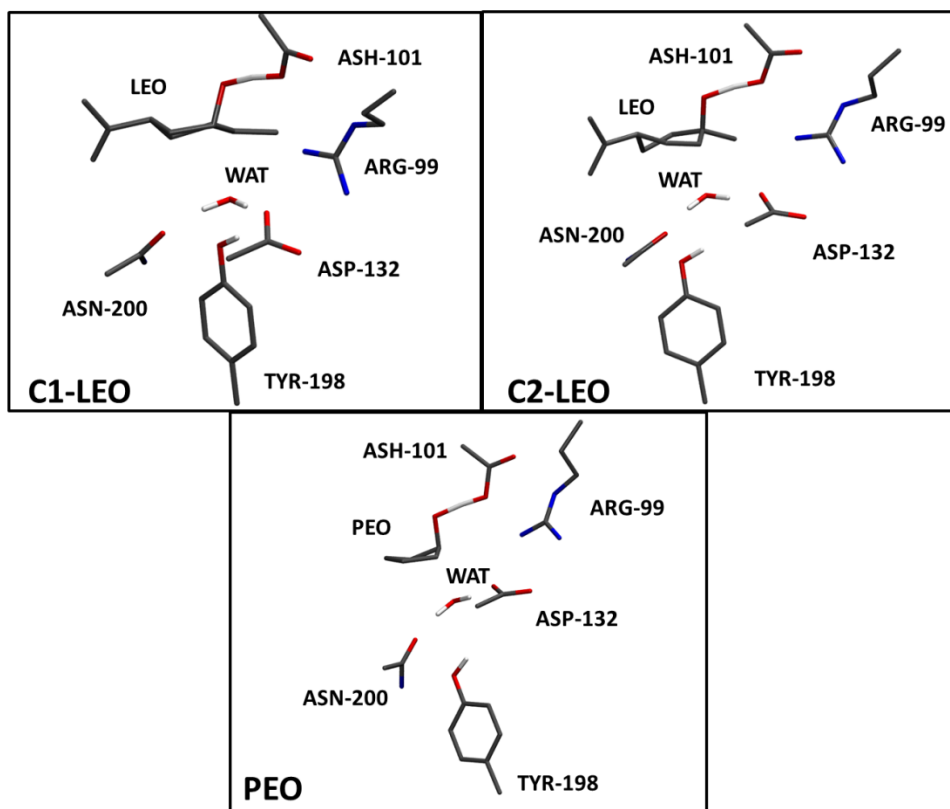

**Figure S15.** Conformations of the TSs catalytic pockets in C1-LEO, C2-LEO and PEO.

**Table S2.** Structural parameters of the reactant, transition state and product in C1-LEO, C2-LEO and PEO.

|        |     | C6-C5<br>(Å) | C4-C5<br>(Å) | C3-C4<br>(Å) | C1-C6<br>(Å) | C1-C2<br>(Å) | C2-C3<br>(Å) | C1-C7<br>(Å) | C1-O<br>(Å) | C2-O<br>(Å) | C4-C8<br>(Å) |
|--------|-----|--------------|--------------|--------------|--------------|--------------|--------------|--------------|-------------|-------------|--------------|
| LEO-C1 | Re  | 1.52         | 1.52         | 1.53         | 1.51         | 1.48         | 1.50         | 1.50         | 1.51        | 1.49        | 1.51         |
|        | TS  | 1.52         | 1.52         | 1.53         | 1.49         | 1.48         | 1.52         | 1.48         | 2.06        | 1.47        | 1.51         |
|        | Pro | 1.51         | 1.52         | 1.53         | 1.53         | 1.52         | 1.52         | 1.52         | 2.35        | 1.43        | 1.51         |
| LEO-C2 | Re  | 1.52         | 1.52         | 1.53         | 1.52         | 1.48         | 1.50         | 1.50         | 1.50        | 1.49        | 1.51         |
|        | TS  | 1.52         | 1.52         | 1.53         | 1.53         | 1.48         | 1.49         | 1.51         | 1.48        | 2.02        | 1.51         |
|        | Pro | 1.52         | 1.52         | 1.53         | 1.54         | 1.54         | 1.52         | 1.52         | 1.45        | 2.41        | 1.51         |
|        |     |              |              |              |              |              |              |              |             |             |              |
|        |     | C4-C5<br>(Å) | C3-C4<br>(Å) | C1-C5<br>(Å) | C1-C2<br>(Å) | C2-C3<br>(Å) | C1-O<br>(Å)  | C2-O<br>(Å)  |             |             |              |
| PEO    | Re  | 1.53         | 1.53         | 1.50         | 1.47         | 1.51         | 1.49         | 1.49         |             |             |              |
|        | TS  | 1.53         | 1.52         | 1.49         | 1.48         | 1.52         | 2.03         | 1.46         |             |             |              |
|        | Pro | 1.53         | 1.52         | 1.52         | 1.53         | 1.52         | 2.42         | 1.43         |             |             |              |

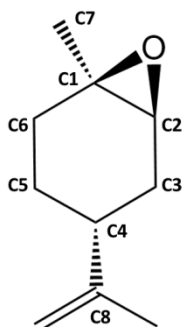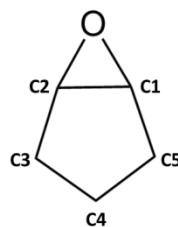

**Table S3.** Evolution of structural parameters associated to the catalytic mechanism along the MEPs.

|        |     | Owat-Cepo | Cepo-Oepo | Oepo-Hash | Hash-Oash | Owat-Hwat | Hwat-Oasp | Owat-Htyr | Hwat-Oasn | Cash-Carg | Casp-Carg | Owat-Cepo-Cepo | Owat-Cepo-Oepo |
|--------|-----|-----------|-----------|-----------|-----------|-----------|-----------|-----------|-----------|-----------|-----------|----------------|----------------|
|        |     | (Å)       | (°)            | (°)            |
| LEO-C1 | Re  | 3.19      | 1.51      | 1.71      | 1.01      | 0.99      | 1.79      | 1.95      | 1.76      | 4.18      | 3.87      | 77.9           | 136.4          |
|        | TS  | 2.38      | 2.06      | 1.26      | 1.18      | 0.99      | 1.72      | 2.22      | 1.74      | 4.09      | 3.89      | 98.4           | 143.2          |
|        | Pro | 1.50      | 2.35      | 1.04      | 1.73      | 1.61      | 1.03      | 2.61      | 1.82      | 3.91      | 4.05      | 109.0          | 144.5          |
| LEO-C2 | Re  | 3.29      | 1.49      | 1.79      | 1.01      | 0.99      | 1.80      | 1.94      | 1.73      | 4.18      | 3.90      | 82.1           | 140.1          |
|        | TS  | 2.11      | 2.02      | 1.32      | 1.15      | 1.01      | 1.66      | 2.69      | 1.68      | 4.08      | 3.93      | 102.7          | 148.0          |
|        | Pro | 1.49      | 2.41      | 1.01      | 1.76      | 1.49      | 1.05      | 3.18      | 1.70      | 3.91      | 4.08      | 108.7          | 143.4          |
| PEO    | Re  | 3.19      | 1.50      | 1.69      | 1.01      | 0.99      | 1.81      | 1.99      | 1.74      | 4.22      | 3.91      | 95.9           | 148.7          |
|        | TS  | 2.10      | 2.00      | 1.33      | 1.13      | 1.00      | 1.68      | 2.72      | 1.73      | 4.12      | 3.95      | 109.2          | 150.9          |
|        | Pro | 1.49      | 2.40      | 1.01      | 1.75      | 1.59      | 1.03      | 3.24      | 1.73      | 3.95      | 4.11      | 109.9          | 140.7          |

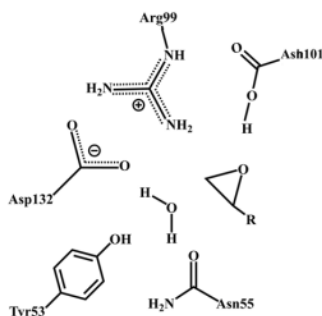

**Table S4.** Partial atomic charges from Mulliken population analysis (with charges summed on heavy atoms) of the QM atoms along the MEPs from B3LYP/6-31G\*/ff99SB//SCC-DFTB/ff99SB) single point energy calculations. Different residues are reported according to different color codes.

| C1-LEO |    |       |       |       |       |       | C2-LEO |   |    |       |       |       |    | PEO |     |  |        |  |  |  |  |
|--------|----|-------|-------|-------|-------|-------|--------|---|----|-------|-------|-------|----|-----|-----|--|--------|--|--|--|--|
|        |    | Re    | TS    | Pro   | Re    | TS    | Pro    |   |    | Re    | TS    | Pro   | Re | TS  | Pro |  |        |  |  |  |  |
| C      | 1  | 0.20  | 0.19  | 0.18  | 0.20  | 0.19  | 0.18   | C | 1  | 0.20  | 0.19  | 0.18  |    |     |     |  | ARG99  |  |  |  |  |
| N      | 4  | -0.21 | -0.20 | -0.17 | -0.21 | -0.20 | -0.17  | N | 4  | -0.22 | -0.21 | -0.18 |    |     |     |  |        |  |  |  |  |
| C      | 6  | 0.75  | 0.74  | 0.74  | 0.74  | 0.74  | 0.74   | C | 6  | 0.75  | 0.74  | 0.74  |    |     |     |  |        |  |  |  |  |
| N      | 7  | -0.05 | -0.05 | -0.07 | -0.05 | -0.05 | -0.07  | N | 7  | -0.04 | -0.05 | -0.07 |    |     |     |  |        |  |  |  |  |
| N      | 10 | -0.04 | -0.05 | -0.05 | -0.04 | -0.05 | -0.05  | N | 10 | -0.05 | -0.05 | -0.06 |    |     |     |  |        |  |  |  |  |
| C      | 13 | 0.05  | 0.01  | -0.02 | 0.03  | 0.00  | -0.04  | C | 13 | 0.02  | 0.00  | -0.05 |    |     |     |  | ASH101 |  |  |  |  |
| C      | 16 | 0.59  | 0.59  | 0.58  | 0.59  | 0.59  | 0.58   | C | 16 | 0.59  | 0.59  | 0.58  |    |     |     |  |        |  |  |  |  |
| O      | 17 | -0.44 | -0.48 | -0.56 | -0.43 | -0.48 | -0.57  | O | 17 | -0.43 | -0.48 | -0.56 |    |     |     |  |        |  |  |  |  |
| O      | 18 | -0.64 | -0.66 | -0.59 | -0.63 | -0.65 | -0.59  | O | 18 | -0.63 | -0.65 | -0.59 |    |     |     |  |        |  |  |  |  |
| H      | 19 | 0.47  | 0.49  | 0.45  | 0.46  | 0.48  | 0.44   | H | 19 | 0.47  | 0.49  | 0.44  |    |     |     |  |        |  |  |  |  |
| C      | 20 | -0.06 | -0.06 | 0.01  | -0.06 | -0.06 | 0.00   | C | 20 | -0.06 | -0.06 | 0.01  |    |     |     |  | ASP132 |  |  |  |  |
| C      | 23 | 0.56  | 0.56  | 0.59  | 0.56  | 0.57  | 0.59   | C | 23 | 0.56  | 0.56  | 0.59  |    |     |     |  |        |  |  |  |  |
| O      | 24 | -0.59 | -0.58 | -0.47 | -0.60 | -0.58 | -0.48  | O | 24 | -0.59 | -0.58 | -0.46 |    |     |     |  |        |  |  |  |  |
| O      | 25 | -0.59 | -0.60 | -0.14 | -0.59 | -0.60 | -0.13  | O | 25 | -0.59 | -0.60 | -0.14 |    |     |     |  |        |  |  |  |  |
| C      | 6  | 0.00  | 0.06  | 0.03  | 0.00  | 0.01  | 0.01   | C | 3  | 0.05  | 0.04  | 0.01  |    |     |     |  |        |  |  |  |  |
| C      | 5  | 0.02  | 0.01  | -0.04 | 0.01  | -0.01 | -0.03  |   |    |       |       |       |    |     |     |  |        |  |  |  |  |
| C      | 4  | -0.02 | 0.00  | 0.02  | 0.00  | 0.03  | 0.03   | C | 4  | 0.00  | 0.02  | 0.01  |    |     |     |  |        |  |  |  |  |
| C      | 3  | 0.03  | 0.02  | -0.02 | 0.03  | 0.04  | -0.02  | C | 5  | 0.05  | 0.05  | -0.02 |    |     |     |  | EPO    |  |  |  |  |
| C      | 1  | 0.34  | 0.38  | 0.32  | 0.34  | 0.35  | 0.32   | C | 2  | 0.25  | 0.26  | 0.26  |    |     |     |  |        |  |  |  |  |
| O      | 32 | -0.57 | -0.67 | -0.25 | -0.57 | -0.69 | -0.29  | O | 28 | -0.55 | -0.66 | -0.27 |    |     |     |  |        |  |  |  |  |
| C      | 8  | 0.02  | 0.02  | 0.01  | 0.02  | 0.02  | 0.01   |   |    |       |       |       |    |     |     |  |        |  |  |  |  |
| C      | 2  | 0.22  | 0.24  | 0.22  | 0.23  | 0.25  | 0.24   | C | 1  | 0.26  | 0.28  | 0.26  |    |     |     |  |        |  |  |  |  |
| O      | 53 | -0.93 | -0.88 | -0.75 | -0.93 | -0.83 | -0.73  | O | 40 | -0.93 | -0.82 | -0.74 |    |     |     |  | WAT    |  |  |  |  |
| H      | 54 | 0.45  | 0.47  | 0.48  | 0.45  | 0.48  | 0.49   | H | 41 | 0.44  | 0.46  | 0.48  |    |     |     |  |        |  |  |  |  |
| H      | 55 | 0.45  | 0.46  | 0.47  | 0.45  | 0.46  | 0.49   | H | 42 | 0.45  | 0.48  | 0.49  |    |     |     |  |        |  |  |  |  |

**Cartesian Coordinates of Reactant, Transition State and Product structures from the B3LYP/6-31G\*/ff99SB//SCC-DFTB/ff99SB PES.**

C1-LEO Re

|   |           |           |           |
|---|-----------|-----------|-----------|
| C | 39.013093 | 15.558988 | 23.530540 |
| H | 39.562673 | 14.656412 | 23.218301 |
| H | 38.877331 | 15.502775 | 24.617960 |
| N | 37.753171 | 15.584924 | 22.835537 |
| H | 37.832808 | 15.582371 | 21.789271 |
| C | 36.582193 | 16.039749 | 23.345902 |
| N | 36.398790 | 16.302880 | 24.651498 |
| H | 37.172802 | 16.226069 | 25.319069 |
| H | 35.475949 | 16.736715 | 24.963067 |
| N | 35.554322 | 16.167794 | 22.495946 |
| H | 35.714899 | 15.999290 | 21.489263 |
| H | 34.603356 | 16.535172 | 22.844433 |
| C | 37.510909 | 16.401541 | 17.777440 |
| H | 37.306651 | 17.473966 | 17.656734 |
| H | 36.751941 | 15.864816 | 17.196058 |
| C | 37.366827 | 16.042402 | 19.236089 |
| O | 38.234795 | 16.133716 | 20.089131 |
| O | 36.123245 | 15.603613 | 19.636487 |
| H | 35.351439 | 15.821443 | 19.014938 |
| C | 32.642059 | 19.289653 | 24.281273 |
| H | 31.607302 | 19.162231 | 23.942646 |
| H | 33.156521 | 19.870734 | 23.500846 |
| C | 33.361681 | 17.936680 | 24.349237 |



|   |           |           |           |
|---|-----------|-----------|-----------|
| O | 34.085521 | 17.602975 | 25.349594 |
| O | 33.246858 | 17.201252 | 23.294317 |
| C | 31.373833 | 15.347662 | 18.551667 |
| C | 30.437434 | 16.535200 | 18.449231 |
| C | 31.196399 | 17.769141 | 17.981551 |
| C | 32.178590 | 18.211984 | 19.067411 |
| C | 33.027732 | 14.595960 | 20.346240 |
| C | 32.598521 | 15.663341 | 19.383701 |
| O | 33.747519 | 16.270048 | 18.607621 |
| C | 30.289480 | 18.918733 | 17.603496 |
| C | 30.839088 | 19.864019 | 16.585991 |
| C | 29.067712 | 19.095249 | 18.126357 |
| H | 30.840708 | 14.492823 | 19.006912 |

# C1-LEO TS

|   |           |           |           |
|---|-----------|-----------|-----------|
| C | 39.004305 | 15.556544 | 23.491386 |
| H | 39.553729 | 14.655673 | 23.173401 |
| H | 38.863323 | 15.490099 | 24.578517 |
| N | 37.750537 | 15.595894 | 22.787100 |
| H | 37.838702 | 15.625582 | 21.730873 |
| C | 36.588870 | 16.070858 | 23.289625 |
| N | 36.390315 | 16.304161 | 24.601206 |
| H | 37.151622 | 16.188124 | 25.277028 |
| H | 35.472088 | 16.730500 | 24.918685 |
| N | 35.581076 | 16.256064 | 22.424379 |
| H | 35.751753 | 16.097956 | 21.405377 |
| H | 34.641290 | 16.596332 | 22.778857 |

|   |           |           |           |
|---|-----------|-----------|-----------|
| C | 37.413800 | 16.422268 | 17.786760 |
| H | 37.213717 | 17.493178 | 17.648894 |
| H | 36.667047 | 15.883086 | 17.191822 |
| C | 37.224269 | 16.077675 | 19.253527 |
| O | 38.133341 | 16.121021 | 20.092516 |
| O | 35.978090 | 15.741404 | 19.651525 |
| H | 35.020218 | 16.080438 | 19.046856 |
| C | 32.642965 | 19.274830 | 24.272599 |
| H | 31.609950 | 19.170687 | 23.920957 |
| H | 33.180662 | 19.842088 | 23.497922 |
| C | 33.331405 | 17.903987 | 24.361660 |
| O | 34.062921 | 17.583162 | 25.355814 |
| O | 33.183894 | 17.138311 | 23.328269 |
| C | 31.237193 | 15.445168 | 18.973358 |
| C | 30.371447 | 16.642436 | 18.633495 |
| C | 31.207902 | 17.776577 | 18.057880 |
| C | 32.247775 | 18.236749 | 19.082396 |
| C | 33.060867 | 14.719377 | 20.588665 |
| C | 32.398080 | 15.803503 | 19.829401 |
| O | 33.904788 | 16.444627 | 18.575018 |
| C | 30.363002 | 18.949127 | 17.607658 |
| C | 30.979767 | 19.830655 | 16.572371 |
| C | 29.131954 | 19.199010 | 18.077297 |
| H | 30.638975 | 14.661325 | 19.475683 |

#### C1-LEO Pro

|   |           |           |           |
|---|-----------|-----------|-----------|
| C | 39.050939 | 15.551086 | 23.367781 |
| H | 39.609156 | 14.672008 | 23.007543 |
| H | 38.891278 | 15.414088 | 24.447990 |

|   |           |           |           |
|---|-----------|-----------|-----------|
| N | 37.819109 | 15.640723 | 22.631762 |
| H | 37.947046 | 15.791568 | 21.527741 |
| C | 36.659810 | 16.060271 | 23.147495 |
| N | 36.460896 | 16.233917 | 24.482826 |
| H | 37.239039 | 16.145958 | 25.142523 |
| H | 35.570431 | 16.635003 | 24.825373 |
| N | 35.642111 | 16.273399 | 22.294195 |
| H | 35.798843 | 16.080688 | 21.244925 |
| H | 34.714590 | 16.528929 | 22.660476 |
| C | 37.488959 | 16.428584 | 17.806781 |
| H | 37.293188 | 17.498685 | 17.654476 |
| H | 36.734198 | 15.885681 | 17.224494 |
| C | 37.286420 | 16.110889 | 19.288514 |
| O | 38.240961 | 16.236368 | 20.124588 |
| O | 36.087322 | 15.783700 | 19.661821 |
| H | 34.564340 | 16.210715 | 18.972142 |
| C | 32.615337 | 19.179409 | 24.275361 |
| H | 31.587889 | 19.056522 | 23.917247 |
| H | 33.173609 | 19.686779 | 23.475408 |
| C | 33.280959 | 17.841642 | 24.501711 |
| O | 34.067451 | 17.593430 | 25.415048 |
| O | 33.065302 | 16.871073 | 23.580096 |
| C | 30.917781 | 15.633712 | 19.400598 |
| C | 30.115860 | 16.805926 | 18.879766 |
| C | 31.012923 | 17.832283 | 18.202037 |
| C | 32.112278 | 18.293719 | 19.160735 |
| C | 32.827821 | 14.856584 | 20.808241 |
| C | 32.027321 | 16.064031 | 20.356347 |
| O | 33.604656 | 16.448037 | 18.662420 |
| C | 30.240286 | 19.017659 | 17.666352 |

|   |           |           |           |
|---|-----------|-----------|-----------|
| C | 30.927308 | 19.817263 | 16.608226 |
| C | 29.006049 | 19.350173 | 18.074864 |
| H | 30.248881 | 14.909464 | 19.903113 |

## C2-LEO Re

|   |           |           |           |
|---|-----------|-----------|-----------|
| C | 38.334047 | 15.560224 | 23.661941 |
| H | 38.854145 | 14.642527 | 23.344479 |
| H | 38.202578 | 15.507186 | 24.749998 |
| N | 37.067744 | 15.619544 | 22.978346 |
| H | 37.126412 | 15.552511 | 21.934758 |
| C | 35.901613 | 16.084245 | 23.488497 |
| N | 35.737653 | 16.413574 | 24.782147 |
| H | 36.516052 | 16.353153 | 25.447024 |
| H | 34.810440 | 16.838993 | 25.085813 |
| N | 34.851533 | 16.155717 | 22.656470 |
| H | 34.995257 | 15.961878 | 21.652869 |
| H | 33.923075 | 16.598622 | 22.983124 |
| C | 36.774838 | 16.650507 | 17.963332 |
| H | 36.604492 | 17.736056 | 17.959272 |
| H | 36.001554 | 16.207321 | 17.326066 |
| C | 36.621597 | 16.134546 | 19.374897 |
| O | 37.501561 | 16.088624 | 20.217880 |
| O | 35.358873 | 15.721186 | 19.733353 |
| H | 34.622545 | 15.995004 | 19.103398 |
| C | 31.986393 | 19.442040 | 24.416900 |
| H | 30.966573 | 19.346109 | 24.027019 |

|   |           |           |           |
|---|-----------|-----------|-----------|
| H | 32.539215 | 20.063358 | 23.696146 |
| C | 32.688142 | 18.075281 | 24.435136 |
| O | 33.370466 | 17.672600 | 25.440542 |
| O | 32.603599 | 17.402387 | 23.336488 |
| C | 30.605147 | 15.669174 | 18.390568 |
| C | 29.712017 | 16.889915 | 18.286003 |
| C | 30.532032 | 18.139520 | 17.996903 |
| C | 31.411369 | 18.461448 | 19.206693 |
| C | 32.130358 | 14.742738 | 20.222284 |
| C | 31.782710 | 15.890009 | 19.317966 |
| O | 32.976049 | 16.536641 | 18.674437 |
| C | 29.682312 | 19.339103 | 17.639061 |
| C | 30.336749 | 20.369460 | 16.778188 |
| C | 28.420400 | 19.492687 | 18.066241 |
| H | 30.015748 | 14.809427 | 18.760409 |

## C2-LEO TS

|   |           |           |           |
|---|-----------|-----------|-----------|
| C | 38.329443 | 15.552371 | 23.624121 |
| H | 38.849930 | 14.638294 | 23.296763 |
| H | 38.195088 | 15.485477 | 24.712066 |
| N | 37.068024 | 15.624098 | 22.934446 |
| H | 37.131757 | 15.594752 | 21.878491 |
| C | 35.907396 | 16.088737 | 23.443933 |
| N | 35.734074 | 16.388371 | 24.747455 |
| H | 36.509092 | 16.313636 | 25.414339 |
| H | 34.818035 | 16.815641 | 25.058657 |
| N | 34.866921 | 16.195482 | 22.602437 |

|   |           |           |           |
|---|-----------|-----------|-----------|
| H | 35.014135 | 16.021607 | 21.584259 |
| H | 33.946816 | 16.587227 | 22.947657 |
| C | 36.665024 | 16.653292 | 17.981602 |
| H | 36.491857 | 17.737456 | 17.963012 |
| H | 35.904773 | 16.204987 | 17.333817 |
| C | 36.477836 | 16.152383 | 19.402991 |
| O | 37.399271 | 16.088768 | 20.226230 |
| O | 35.233092 | 15.806277 | 19.785495 |
| H | 34.305329 | 16.105520 | 19.167470 |
| C | 31.996738 | 19.440268 | 24.436452 |
| H | 30.981705 | 19.359784 | 24.030503 |
| H | 32.575625 | 20.041656 | 23.719213 |
| C | 32.667755 | 18.058271 | 24.488118 |
| O | 33.376149 | 17.683221 | 25.475744 |
| O | 32.527046 | 17.335900 | 23.419700 |
| C | 30.775767 | 15.657449 | 18.448927 |
| C | 29.823335 | 16.831406 | 18.332831 |
| C | 30.597532 | 18.117715 | 18.088755 |
| C | 31.405445 | 18.463573 | 19.343433 |
| C | 32.302109 | 14.755289 | 20.236819 |
| C | 31.971905 | 15.945426 | 19.362114 |
| O | 33.152908 | 16.444188 | 18.621613 |
| C | 29.722015 | 19.288452 | 17.698010 |
| C | 30.359972 | 20.320531 | 16.826956 |
| C | 28.451898 | 19.415046 | 18.109808 |
| H | 30.223863 | 14.779426 | 18.834109 |

## C2-LEO Pro

|   |           |           |           |
|---|-----------|-----------|-----------|
| C | 38.329443 | 15.552371 | 23.624121 |
|---|-----------|-----------|-----------|

|   |           |           |           |
|---|-----------|-----------|-----------|
| H | 38.849930 | 14.638294 | 23.296763 |
| H | 38.195088 | 15.485477 | 24.712066 |
| N | 37.068024 | 15.624098 | 22.934446 |
| H | 37.131757 | 15.594752 | 21.878491 |
| C | 35.907396 | 16.088737 | 23.443933 |
| N | 35.734074 | 16.388371 | 24.747455 |
| H | 36.509092 | 16.313636 | 25.414339 |
| H | 34.818035 | 16.815641 | 25.058657 |
| N | 34.866921 | 16.195482 | 22.602437 |
| H | 35.014135 | 16.021607 | 21.584259 |
| H | 33.946816 | 16.587227 | 22.947657 |
| C | 36.665024 | 16.653292 | 17.981602 |
| H | 36.491857 | 17.737456 | 17.963012 |
| H | 35.904773 | 16.204987 | 17.333817 |
| C | 36.477836 | 16.152383 | 19.402991 |
| O | 37.399271 | 16.088768 | 20.226230 |
| O | 35.233092 | 15.806277 | 19.785495 |
| H | 34.305329 | 16.105520 | 19.167470 |
| C | 31.996738 | 19.440268 | 24.436452 |
| H | 30.981705 | 19.359784 | 24.030503 |
| H | 32.575625 | 20.041656 | 23.719213 |
| C | 32.667755 | 18.058271 | 24.488118 |
| O | 33.376149 | 17.683221 | 25.475744 |
| O | 32.527046 | 17.335900 | 23.419700 |
| C | 30.775767 | 15.657449 | 18.448927 |
| C | 29.823335 | 16.831406 | 18.332831 |
| C | 30.597532 | 18.117715 | 18.088755 |
| C | 31.405445 | 18.463573 | 19.343433 |
| C | 32.302109 | 14.755289 | 20.236819 |
| C | 31.971905 | 15.945426 | 19.362114 |

|   |           |           |           |
|---|-----------|-----------|-----------|
| O | 33.152908 | 16.444188 | 18.621613 |
| C | 29.722015 | 19.288452 | 17.698010 |
| C | 30.359972 | 20.320531 | 16.826956 |
| C | 28.451898 | 19.415046 | 18.109808 |
| H | 30.223863 | 14.779426 | 18.834109 |

## PEO Re

|   |           |           |           |
|---|-----------|-----------|-----------|
| C | 44.455251 | 20.592263 | 18.117760 |
| H | 44.665552 | 20.383568 | 17.057692 |
| H | 45.190639 | 21.330360 | 18.463738 |
| N | 44.559276 | 19.358925 | 18.854161 |
| H | 43.973356 | 18.575968 | 18.484584 |
| C | 45.051278 | 19.213043 | 20.108272 |
| N | 45.688144 | 20.191403 | 20.772630 |
| H | 45.846422 | 21.109607 | 20.344806 |
| H | 45.992062 | 20.011954 | 21.774880 |
| N | 44.926644 | 18.004620 | 20.681739 |
| H | 44.358837 | 17.285608 | 20.208498 |
| H | 45.197667 | 17.860087 | 21.716241 |
| C | 40.864095 | 15.829841 | 18.302314 |
| H | 40.232594 | 15.927894 | 19.194506 |
| H | 41.095066 | 14.763598 | 18.183249 |
| C | 42.159208 | 16.591605 | 18.499310 |
| O | 42.469470 | 17.631812 | 17.943019 |
| O | 43.050822 | 16.032404 | 19.377030 |
| H | 42.666403 | 15.272084 | 19.922856 |



|   |           |           |           |
|---|-----------|-----------|-----------|
| C | 45.041358 | 18.741114 | 25.357062 |
| H | 45.283615 | 17.820260 | 25.901089 |
| H | 43.948558 | 18.750343 | 25.230165 |
| C | 45.633210 | 18.701685 | 23.938672 |
| O | 46.257783 | 19.693222 | 23.432555 |
| O | 45.376245 | 17.620572 | 23.278179 |
| C | 43.051010 | 14.516261 | 22.427044 |
| C | 43.503727 | 13.378842 | 21.604889 |
| O | 42.326438 | 14.176448 | 21.167124 |
| C | 43.091714 | 12.094350 | 22.272780 |
| C | 42.338147 | 13.986239 | 23.640570 |
| C | 42.058928 | 12.520883 | 23.314981 |
| H | 44.367773 | 13.422826 | 20.916406 |
| H | 42.683504 | 11.355206 | 21.560151 |
| H | 42.096396 | 11.882590 | 24.215099 |
| H | 43.974652 | 11.630936 | 22.750341 |
| H | 41.043146 | 12.418003 | 22.893859 |
| H | 43.001882 | 14.079181 | 24.516022 |
| H | 41.413534 | 14.543396 | 23.867098 |

## PEO TS

|   |           |           |           |
|---|-----------|-----------|-----------|
| C | 44.435862 | 20.564960 | 18.108273 |
| H | 44.643812 | 20.358429 | 17.047258 |
| H | 45.178503 | 21.296029 | 18.455526 |
| N | 44.524709 | 19.328066 | 18.839997 |
| H | 43.905713 | 18.554491 | 18.477185 |

|   |           |           |           |
|---|-----------|-----------|-----------|
| C | 45.016682 | 19.176778 | 20.088280 |
| N | 45.679068 | 20.144872 | 20.749310 |
| H | 45.849249 | 21.060474 | 20.320801 |
| H | 45.981711 | 19.965920 | 21.745412 |
| N | 44.869242 | 17.971999 | 20.667361 |
| H | 44.270637 | 17.260153 | 20.202669 |
| H | 45.162484 | 17.828209 | 21.675726 |
| C | 40.898286 | 15.818436 | 18.347546 |
| H | 40.260387 | 15.908416 | 19.235670 |
| H | 41.132470 | 14.753240 | 18.227418 |
| C | 42.196116 | 16.584595 | 18.563928 |
| O | 42.495566 | 17.622083 | 17.964779 |
| O | 43.053573 | 16.073704 | 19.466165 |
| H | 42.649559 | 15.224784 | 20.098825 |
| C | 45.028649 | 18.716847 | 25.363993 |
| H | 45.258009 | 17.802148 | 25.924072 |
| H | 43.937039 | 18.735635 | 25.228088 |
| C | 45.635596 | 18.652839 | 23.951789 |
| O | 46.243823 | 19.638923 | 23.432009 |
| O | 45.406630 | 17.547192 | 23.308106 |
| C | 43.322985 | 14.710894 | 22.616325 |
| C | 43.476169 | 13.693833 | 21.549843 |
| O | 42.280155 | 14.257632 | 20.932309 |
| C | 43.152456 | 12.359722 | 22.195526 |
| C | 42.409473 | 14.173068 | 23.661567 |
| C | 42.132946 | 12.719888 | 23.270196 |

|   |           |           |           |
|---|-----------|-----------|-----------|
| H | 44.373366 | 13.720451 | 20.882506 |
| H | 42.754597 | 11.629918 | 21.470764 |
| H | 42.186651 | 12.040980 | 24.140191 |
| H | 44.064235 | 11.922556 | 22.642333 |
| H | 41.112590 | 12.634668 | 22.859032 |

## PEO Pro

|   |           |           |           |
|---|-----------|-----------|-----------|
| C | 44.367307 | 20.495211 | 17.996810 |
| H | 44.537172 | 20.288560 | 16.929424 |
| H | 45.140830 | 21.208338 | 18.317863 |
| N | 44.434909 | 19.256108 | 18.723361 |
| H | 43.727944 | 18.482444 | 18.397119 |
| C | 44.976902 | 19.096262 | 19.935422 |
| N | 45.717602 | 20.058534 | 20.546773 |
| H | 45.897417 | 20.957908 | 20.090664 |
| H | 46.064989 | 19.914955 | 21.508507 |
| N | 44.807445 | 17.907758 | 20.544326 |
| H | 44.112722 | 17.191677 | 20.135248 |
| H | 45.199553 | 17.761173 | 21.485636 |
| C | 40.918388 | 15.786420 | 18.388442 |
| H | 40.257217 | 15.840496 | 19.262461 |
| H | 41.166421 | 14.727126 | 18.240902 |
| C | 42.218997 | 16.561025 | 18.675517 |
| O | 42.521886 | 17.582782 | 17.983076 |
| O | 42.962932 | 16.128476 | 19.644781 |
| H | 43.139343 | 14.560801 | 20.402070 |

|   |           |           |           |
|---|-----------|-----------|-----------|
| C | 45.091709 | 18.767805 | 25.260644 |
| H | 45.293571 | 17.828589 | 25.788640 |
| H | 44.018068 | 18.776030 | 25.024331 |
| C | 45.841606 | 18.820544 | 23.948404 |
| O | 46.339074 | 19.823517 | 23.448370 |
| O | 45.908310 | 17.658930 | 23.245695 |
| C | 43.648122 | 14.910622 | 22.891856 |
| C | 44.128194 | 13.787472 | 21.976136 |
| O | 43.230412 | 13.664486 | 20.865248 |
| C | 44.017677 | 12.536816 | 22.838806 |
| C | 42.569662 | 14.282238 | 23.762963 |
| C | 42.788031 | 12.769585 | 23.707805 |
| H | 45.182115 | 13.965157 | 21.613904 |
| H | 43.931002 | 11.621078 | 22.231501 |
| H | 42.914442 | 12.340361 | 24.717823 |
| H | 44.920257 | 12.431355 | 23.468355 |
| H | 41.906158 | 12.275034 | 23.265424 |
| H | 42.626245 | 14.664076 | 24.793452 |
| H | 41.569721 | 14.547182 | 23.381726 |

## References

- (1) Arand, M.; Hallberg, B. M.; Zou, J.; Bergfors, T.; Oesch, F.; Werf, M. J. van der; Bont, J. A. M. de; Jones, T. A.; Mowbray, S. L. Structure of Rhodococcus Erythropolis Limonene-1,2-Epoxyde Hydrolase Reveals a Novel Active Site. *EMBO J.* **2003**, *22*, 2583–2592.
- (2) Friesner, R. A.; Banks, J. L.; Murphy, R. B.; Halgren, T. A.; Klicic, J. J.; Mainz, D. T.; Repasky, M. P.; Knoll, E. H.; Shelley, M.; Perry, J. K.; Shaw, D. E.; Francis, P.; Shenkin, P. S. Glide: A

New Approach for Rapid, Accurate Docking and Scoring. 1. Method and Assessment of Docking Accuracy. *J. Med. Chem.* **2004**, *47*, 1739–1749.

- (3) Kaminski, G. A.; Friesner, R. A.; Tirado-Rives, J.; Jorgensen, W. L. Evaluation and Reparametrization of the OPLS-AA Force Field for Proteins via Comparison with Accurate Quantum Chemical Calculations on Peptides. *J. Phys. Chem. B* **2001**, *105*, 6474–6487.
- (4) Pearlman, D. A.; Case, D. A.; Caldwell, J. W.; Ross, W. S.; Cheatham, T. E.; DeBolt, S.; Ferguson, D.; Seibel, G.; Kollman, P. AMBER, a Package of Computer Programs for Applying Molecular Mechanics, Normal Mode Analysis, Molecular Dynamics and Free Energy Calculations to Simulate the Structural and Energetic Properties of Molecules. *Comput. Phys. Commun.* **1995**, *91*, 1–41.
- (5) Wang, J.; Wolf, R. M.; Caldwell, J. W.; Kollman, P. A.; Case, D. A. Development and Testing of a General Amber Force Field. *J. Comput. Chem.* **2004**, *25*, 1157–1174.
- (6) Hornak, V.; Abel, R.; Okur, A.; Strockbine, B.; Roitberg, A.; Simmerling, C. Comparison of Multiple Amber Force Fields and Development of Improved Protein Backbone Parameters. *Proteins Struct. Funct. Bioinforma.* **2006**, *65*, 712–725.
- (7) Jorgensen, W. L.; Chandrasekhar, J.; Madura, J. D.; Impey, R. W.; Klein, M. L. Comparison of Simple Potential Functions for Simulating Liquid Water. *J. Chem. Phys.* **1983**, *79*, 926.
- (8) Darden, T.; York, D.; Pedersen, L. Particle Mesh Ewald: An  $N \cdot \log(N)$  Method for Ewald Sums in Large Systems. *J. Chem. Phys.* **1993**, *98*, 10089.
- (9) Ryckaert, J.-P.; Ciccotti, G.; Berendsen, H. J. . Numerical Integration of the Cartesian Equations of Motion of a System with Constraints: Molecular Dynamics of N-Alkanes. *J. Comput. Phys.* **1977**, *23*, 327–341.
- (10) Bas, D. C.; Rogers, D. M.; Jensen, J. H. Very Fast Prediction and Rationalization of pKa Values for Protein-Ligand Complexes. *Proteins* **2008**, *73*, 765–783.
- (11) Hopmann, K. H.; Hallberg, B. M.; Himo, F. Catalytic Mechanism of Limonene Epoxide Hydrolase, a Theoretical Study. *J. Am. Chem. Soc.* **2005**, *127*, 14339–14347.
- (12) Reuter, N.; Dejaegere, A.; Maigret, B.; Karplus, M. Frontier Bonds in QM/MM Methods: A Comparison of Different Approaches. *J. Phys. Chem. A* **2000**, *104*, 1720–1735.
- (13) Field, M. J.; Bash, P. A.; Karplus, M. A Combined Quantum Mechanical and Molecular

Mechanical Potential for Molecular Dynamics Simulations. *J. Comput. Chem.* **1990**, *11*, 700–733.

- (14) Loncharich, R. J.; Brooks, B. R.; Pastor, R. W. Langevin Dynamics of Peptides: The Frictional Dependence of Isomerization Rates of N-Acetylalanine-N'-Methylamide. *Biopolymers* **1992**, *32*, 523–535.
- (15) Cui, Q.; Elstner, M.; Kaxiras, E.; Frauenheim, T.; Karplus, M. A QM/MM Implementation of the Self-Consistent Charge Density Functional Tight Binding (SCC-DFTB) Method. *J. Phys. Chem. B* **2000**, *105*, 569–585.
- (16) Bowman, A. L.; Grant, I. M.; Mulholland, A. J. QM/MM Simulations Predict a Covalent Intermediate in the Hen Egg White Lysozyme Reaction with Its Natural Substrate. *Chem. Commun.* **2008**, *0*, 4425.
- (17) Woods, C. J.; Malaisree, M.; Hannongbua, S.; Mulholland, A. J. A Water-Swap Reaction Coordinate for the Calculation of Absolute Protein–ligand Binding Free Energies. *J. Chem. Phys.* **2011**, *134*, 54114.
